# Supplementary material for: Study on the Influence Mechanism of Human Thermal Comfort Models in Plant Cultivation Simulation and Microclimate Regulation
Source: Research Square preprint supplement (doi:10.21203/rs.3.rs-7648784/v1), 2025-11-06
Supplement: Supplementary file 1 [file 38bc5a79a8a5d124b6040d96.xlsx]

## Sheet: 乔木
植物类型	种名	植物图鉴	WCO2(g/(m²·d))	WO2(g/(m²·d))	LAI	QCO2(g/(m²·d))	QO2(g/(m²·d))	冠幅（m）	垂直投影面积（ΠD²/4）	M固碳量	M释氧量	固碳释氧数据引用文献	lai数据引用文献	种植1区	种植2区	种植3区
乔木	合欢	=DISPIMG("ID_F80B938F968E4079B3F74600AFB23C8C",1)	167.18	148.96	4.12	688.782	613.715	4	12.5664	8655.48	7712.17		[1]赵萱,李海梅.11种地被植物固碳释氧与降温增湿效益研究[J].江西农业学报,2009,21(01):44-47.	5		69
	刺槐	=DISPIMG("ID_155177BC988D4BEFB9874ED8D5547431",1)	102.09	74.25	4.56	465.53	338.58	3	7.06858	3290.64	2393.28		[2]冯晶红,刘德富,吴耕华,刘煜,秦东旭,王可健,刘瑛. 三峡库区消落带适生植物固碳释氧能力研究[J]. 水生态学杂志,2020,41(01):1-8	4
	梧桐	=DISPIMG("ID_54D4C18BAE414C5CA6D7FA60C26BA889",1)	22.4	12.7	5.54	124.096	70.358	3	7.06858	877.182	497.331		[4]史红文,秦泉,廖建雄,陈桂桥,丁昭全. 武汉市10种优势园林植物固碳释氧能力研究[J]. 中南林业科技大学学报,2011,31(09):87-90
	樟树	=DISPIMG("ID_E5C45F99519D416FBE53864F509A88A0",1)	9.19	6.68	4.24	38.9656	28.3232	3.5	9.62112	374.893	272.501
	白玉兰		9.05	6.58	2.13	19.2765	14.0154	4.5	15.9043	306.579	222.905
	栾树	=DISPIMG("ID_461D33A837FA40619B8B4B6264510387",1)	15.86	11.53	4.534	71.9092	52.277	2	3.14159	225.909	164.233		[7]于雅鑫. 12种木兰科乔木的固碳释氧和降温增湿能力及景观评价研究[D].中南林业科技大学,2013
	银杏	=DISPIMG("ID_3C2AB329E1FC4C439A59E7646DE69456",1)	6.38	4.64	2.491	15.8926	11.5582	4	12.5664	199.712	145.245			23（7+7+9）

## Sheet: 灌木
植物类型	种名	植物图鉴	WCO2(g/(m²·d))	WO2(g/(m²·d))	LAI	QCO2(g/(m²·d))	QO2(g/(m²·d))	冠幅（m）	垂直投影面积（ΠD²/4）	M固碳量	M释氧量	数据引用文献	种植1区	种植2区	种植3区
灌木	红花檵木	=DISPIMG("ID_0E1CBF81F8EF4785BEC8B9E7E30DA92B",1)	64.91	47.21	3.16	205.116	149.184	1	0.785397	161.097	117.168		2
	紫薇	=DISPIMG("ID_C32E4859EBE446D0AD011E1296DEAA66",1)	19.97	14.52	2.978	59.4707	43.2406	1.2	1.13097	67.2597	48.9039
	海桐	=DISPIMG("ID_9EF8612409464CD78B6745656C42BB28",1)	28.53	20.75	2.748	78.4004	57.021	0.8	0.502654	39.4083	28.6619
	石楠	=DISPIMG("ID_F4EC41F881034633AFBEEB697A5260C0",1)	8.12	5.9	4.637	37.6524	27.3583	0.8	0.502654	18.9262	13.7518
	锦带	=DISPIMG("ID_C2A2C1DD40104F489678AEF513B42557",1)	9.06	6.59	3.14	28.4484	20.6926	0.6	0.282743	8.04359	5.85069		4
	紫藤	=DISPIMG("ID_03BA4F5756954515BE213A193AE816D1",1)	15.67	11.39	2.12	33.2204	24.1468	0.5	0.196349	6.5228	4.74121
	杜鹃	=DISPIMG("ID_4D8703B5FBBE472A93D872B4D89C9F9E",1)	14.77	10.74	3.97	58.6369	42.6378	0.1	0.00785397	0.460533	0.334876		8

## Sheet: 草本
植物类型	种名	植物图鉴	WCO2(g/(m²·d))	WO2(g/(m²·d))	LAI	QCO2(g/(m²·d))	QO2(g/(m²·d))	冠幅（m）	垂直投影面积（ΠD²/4）	M固碳量	M释氧量	数据引用文献	种植1区	种植2区	种植3区
	鸢尾	=DISPIMG("ID_655F95192CFC42378CB0B6587B3198C5",1)	6.34	4.61	4.11	26.0574	18.9471	0.15	0.0176714	0.460472	0.334823		46
	冬麦				5.02							南阳市三种常见草坪地被植物生态效益研究/郭鹏	292
	狗尾草	=DISPIMG("ID_E523F08B082741769FF4708A260F5DE6",1)	0.4	0.3	1.47	0.588	0.441	0.35	0.0962112	0.0565722	0.0424291

## Sheet: 蒸腾
名称	总蒸腾量mmol/（m2·d）	文献
合欢	54.44	陈自新,苏雪痕,刘少宗,古润泽,李延明.北京城市园林绿化生态效益的研究(2)【J】.中国园林,1998(02).
刺槐	63.72	[2]杨清. 煤矿复垦区绿化树种固碳释氧、降温增湿效应研究[D].安徽理工大学,2013.
梧桐	50.8	[2]杨清. 煤矿复垦区绿化树种固碳释氧、降温增湿效应研究[D].安徽理工大学,2013.
樟树	5424.78	[4]康华靖,王艳英,王令俐,李红.基于单木模型对温州常见城市绿化树种固碳增湿能力的比较[J].中南林业科技大学学报,2017,37(07):78-84+98.
白玉兰	87725	[5]邵永昌,张金池,孙永涛,李娟娟,庄家尧,李二焕,薛雪.上海主要绿化树种夏季蒸腾特性与降温增湿功能比较[J].中国水土保持科学,2015,13(06):83-90.
广玉兰	86.77	[3]姚侠妹,偶春,夏璐,姚晓洁,陈媛媛,王宁馨.安徽沿淮地区小城镇主要景观树种固碳释氧和降温增湿效益评估[J].生态学杂志,2021,40(05):1293-1304.
栾树	38606	[6]邵永昌,张金池,孙永涛,李娟娟,庄家尧,李二焕,薛雪.上海主要绿化树种夏季蒸腾特性与降温增湿功能比较[J].中国水土保持科学,2015,13(06):83-90.
银杏	44.267	[13]姚侠妹,偶春,夏璐,姚晓洁,陈媛媛,王宁馨.安徽沿淮地区小城镇主要景观树种固碳释氧和降温增湿效益评估[J].生态学杂志,2021,40(05):1293-1304.
红花檵木	185.861	[8]康华靖,王艳英,王令俐,李红.基于单木模型对温州常见城市绿化树种固碳增湿能力的比较[J].中南林业科技大学学报,2017,37(07):78-84+98.
紫薇	53.54	陈自新,苏雪痕,刘少宗,古润泽,李延明.北京城市园林绿化生态效益的研究(2)【J】.中国园林,1998(02).
海桐	56.27	[2]杨清. 煤矿复垦区绿化树种固碳释氧、降温增湿效应研究[D].安徽理工大学,2013.
石楠	132.149	[3]姚侠妹,偶春,夏璐,姚晓洁,陈媛媛,王宁馨.安徽沿淮地区小城镇主要景观树种固碳释氧和降温增湿效益评估[J].生态学杂志,2021,40(05):1293-1304.
垂丝海棠	128.14	[3]姚侠妹,偶春,夏璐,姚晓洁,陈媛媛,王宁馨.安徽沿淮地区小城镇主要景观树种固碳释氧和降温增湿效益评估[J].生态学杂志,2021,40(05):1293-1304.
山茶	63.6	[3]姚侠妹,偶春,夏璐,姚晓洁,陈媛媛,王宁馨.安徽沿淮地区小城镇主要景观树种固碳释氧和降温增湿效益评估[J].生态学杂志,2021,40(05):1293-1304.
桂花	103.22	[3]姚侠妹,偶春,夏璐,姚晓洁,陈媛媛,王宁馨.安徽沿淮地区小城镇主要景观树种固碳释氧和降温增湿效益评估[J].生态学杂志,2021,40(05):1293-1304.
锦带	22.1	[12]杨清. 煤矿复垦区绿化树种固碳释氧、降温增湿效应研究[D].安徽理工大学,2013.
紫藤	51.56	陈自新,苏雪痕,刘少宗,古润泽,李延明.北京城市园林绿化生态效益的研究(2)【J】.中国园林,1998(02).
杜鹃	89.6	[14]朱燕青. 常见灌木固碳释氧及降温增湿效应研究[D].中南林业科技大学,2013.
鸢尾	0.04	[15]宋卓琴, et al."太原市主要园林植物春季固碳释氧和降温增湿效应." 山西农业科学 46.10(2018):1685-1690+1729.
麦冬	0.02	[15]宋卓琴, et al."太原市主要园林植物春季固碳释氧和降温增湿效应." 山西农业科学 46.10(2018):1685-1690+1729.
结缕草	0.18	[1]李辉,赵卫智.北京5种草坪地被植物生态效益的研究[J].中国园林,1998(04):34-36.
狗尾草	2.53mmol·m-2·s-1	黄刚,赵学勇,崔建垣,苏延桂.水分胁迫对2种科尔沁沙地植物光合和水分利用特性的影响【Z】.西北植物学报,2008(11):2306-2313.

## Sheet: 兴趣区 固碳差值
兴趣区	种类	名称	数量	叶面积指数LAI	lai文献	冠幅	垂直投影面积	单位固碳量WCO2(g/(m²·d))	单位释氧量WO2(g/(m²·d))	总蒸腾量mol/（m2·d）	固碳释氧文献	固碳量Q	释氧量Q	固碳量M	释氧量M	总量固碳	总量释氧	日蒸腾质量WH2O	吸热Q（J）	温度下降ΔT	新温度	Δa	Δe	单位叶片面积增加相对湿度	新湿度	增加相对湿度	WBGT
乔木		合欢	15	1.46	[1]郭晖,周慧,张家洋.郑州市15种常见园林树种固碳释氧能力分析研究[J].西北林学院学报,2017,32(04):52-56.	3.5	9.62113	3.67	3.27	54.44	[5]陈自新,苏雪痕,刘少宗,古润泽,李延明.北京城市园林绿化生态效益的研究(2)【J】.中国园林,1998(02).[6]郭晖,周慧,张家洋.郑州市15种常见园林树种固碳释氧能力分析研究[J].西北林学院学报,2017,32(04):52-56.	5.3582	4.7742	51.5519	45.9332	773.279	688.998	979.92	2.37452e+06	0.157545	30.1805	0.97992	1.37048	0.0395601	0.80756	5.70919	42.1857
		刺槐	20	4.56	[1]徐玮玮. 扬州古运河生态环境林绿地树种配置及环境效应研究[D].扬州大学,2007.	2.8	6.15752	22.39	16.28	63.72	[1]杨清. 煤矿复垦区绿化树种固碳释氧、降温增湿效应研究[D].安徽理工大学,2013. [2]徐玮玮. 扬州古运河生态环境林绿地树种配置及环境效应研究[D].扬州大学,2007.	102.098	74.2368	628.673	457.115	12573.5	9142.29	1146.96	2.77929e+06	0.184401	30.1536	1.14696	1.60409	0.0463036	0.814304	5.70231	42.28
草本		鸢尾	800	4.11	[1]熊向艳,韩永伟,高馨婷,尚洪磊,郑烨,王宝良.北京市城乡结合部17种常用绿化植物固碳释氧功能研究[J].环境工程技术学报,2014,4(03):248-255.	0.15	0.0176715	6.34	4.61	0.04	[12]宋卓琴, et al."太原市主要园林植物春季固碳释氧和降温增湿效应." 山西农业科学 46.10(2018):1685-1690+1729.[13]熊向艳,韩永伟,高馨婷,尚洪磊,郑烨,王宝良.北京市城乡结合部17种常用绿化植物固碳释氧功能研究[J].环境工程技术学报,2014,4(03):247-255.	26.0574	18.9471	0.460472	0.334823	368.378	267.858	0.72	1744.69	0.000115757	30.3379	0.00072	0.00100696	2.90669e-05	0.768029	0.000410924	41.6328
		麦冬	1200	5.02	[6]郭鹏,丁向阳,勇浩,张机伟.南阳市三种常见草坪地被植物生态效益研究[J].河南林业科技,2005(04):17-19.	0.2	0.0314159	6.14	4.45	0.02	[12]宋卓琴, et al."太原市主要园林植物春季固碳释氧和降温增湿效应." 山西农业科学 46.10(2018):1685-1690+1729.[11]郭鹏,丁向阳,勇浩,张机伟.南阳市三种常见草坪地被植物生态效益研究[J].河南林业科技,2005(04):17-19.	30.8228	22.339	0.968327	0.7018	1161.99	842.16	0.36	872.344	5.78784e-05	30.3379	0.00036	0.000503701	1.45398e-05	0.768015	0.000548137	41.6326
		结缕草	1600	10.24	[2]冯晶红,刘德富,吴耕华,刘煜,秦东旭,王可健,刘瑛. 三峡库区消落带适生植物固碳释氧能力研究[J]. 水生态学杂志,2020,41(01):1-8	0.35	0.0962113	4.53	3.3	0.18	[10]李辉,赵卫智.北京5种草坪地被植物生态效益的研究[J].中国园林,1998(04):34-36. [11]郭鹏,丁向阳,勇浩,张机伟.南阳市三种常见草坪地被植物生态效益研究[J].河南林业科技,2005(04):17-19.	46.3872	33.792	4.46297	3.25117	7140.75	5201.87	3.24	7851.09	0.000520906	30.3375	0.00324	0.00453134	0.000130801	0.768131	0.0201353	41.6342
乔草	乔木	银杏	30	3.17	[3]姚侠妹,偶春,夏璐,姚晓洁,陈媛媛,王宁馨.安徽沿淮地区小城镇主要景观树种固碳释氧和降温增湿效益评估[J].生态学杂志,2021,40(05):1293-1304.	3.27	8.39818	6.61	4.41	44.267	[4]姚侠妹,偶春,夏璐,姚晓洁,陈媛媛,王宁馨.安徽沿淮地区小城镇主要景观树种固碳释氧和降温增湿效益评估[J].生态学杂志,2021,40(05):1293-1304.	20.9537	13.9797	175.973	117.404	5279.19	3522.12	796.806	1.9308e+06	0.128105	30.2099	0.796806	1.11438	0.0321676	0.800168	8.10449	42.0823
		广玉兰	30	2.83	[3]姚侠妹,偶春,夏璐,姚晓洁,陈媛媛,王宁馨.安徽沿淮地区小城镇主要景观树种固碳释氧和降温增湿效益评估[J].生态学杂志,2021,40(05):1293-1304.	3.89	11.8847	6.29	4.57	86.77	[4]姚侠妹,偶春,夏璐,姚晓洁,陈媛媛,王宁馨.安徽沿淮地区小城镇主要景观树种固碳释氧和降温增湿效益评估[J].生态学杂志,2021,40(05):1293-1304.	17.8007	12.9331	211.556	153.706	6346.69	4611.19	1561.86	3.78466e+06	0.251106	30.0869	1.56186	2.18436	0.0630534	0.831053	22.4812	42.5143
	草本	鸢尾	700	4.11	[1]熊向艳,韩永伟,高馨婷,尚洪磊,郑烨,王宝良.北京市城乡结合部17种常用绿化植物固碳释氧功能研究[J].环境工程技术学报,2014,4(03):248-255.	0.15	0.0176715	6.34	4.61	0.04	[12]宋卓琴, et al."太原市主要园林植物春季固碳释氧和降温增湿效应." 山西农业科学 46.10(2018):1685-1690+1729.[13]熊向艳,韩永伟,高馨婷,尚洪磊,郑烨,王宝良.北京市城乡结合部17种常用绿化植物固碳释氧功能研究[J].环境工程技术学报,2014,4(03):247-255.	26.0574	18.9471	0.460472	0.334823	322.331	234.376	0.72	1744.69	0.000115757	30.3379	0.00072	0.0010074	2.90795e-05	0.768029	0.000359715	41.6328
		麦冬	1600	5.02	[6]郭鹏,丁向阳,勇浩,张机伟.南阳市三种常见草坪地被植物生态效益研究[J].河南林业科技,2005(04):17-19.	0.2	0.0314159	6.14	4.45	0.02	[12]宋卓琴, et al."太原市主要园林植物春季固碳释氧和降温增湿效应." 山西农业科学 46.10(2018):1685-1690+1729.[11]郭鹏,丁向阳,勇浩,张机伟.南阳市三种常见草坪地被植物生态效益研究[J].河南林业科技,2005(04):17-19.	30.8228	22.339	0.968327	0.7018	1549.32	1122.88	0.36	872.344	5.78784e-05	30.3379	0.00036	0.000503482	1.45335e-05	0.768015	0.000730531	41.6326
乔灌	乔木	合欢	20	1.46	[1]郭晖,周慧,张家洋.郑州市15种常见园林树种固碳释氧能力分析研究[J].西北林学院学报,2017,32(04):52-56.	4	12.5664	3.67	3.27	54.44	[5]陈自新,苏雪痕,刘少宗,古润泽,李延明.北京城市园林绿化生态效益的研究(2)【J】.中国园林,1998(02).[6]郭晖,周慧,张家洋.郑州市15种常见园林树种固碳释氧能力分析研究[J].西北林学院学报,2017,32(04):52-56.	5.3582	4.7742	67.3331	59.9944	1346.66	1199.89	979.92	2.37452e+06	0.157545	30.1805	0.97992	1.37048	0.0395601	0.80756	9.94253	42.1857
		垂丝海棠	40	2.64	[3]姚侠妹,偶春,夏璐,姚晓洁,陈媛媛,王宁馨.安徽沿淮地区小城镇主要景观树种固碳释氧和降温增湿效益评估[J].生态学杂志,2021,40(05):1293-1304.	3.22	8.14332	10.23	7.44	128.14	[4]姚侠妹,偶春,夏璐,姚晓洁,陈媛媛,王宁馨.安徽沿淮地区小城镇主要景观树种固碳释氧和降温增湿效益评估[J].生态学杂志,2021,40(05):1293-1304.	27.0072	19.6416	219.928	159.948	8797.13	6397.92	2306.52	5.58911e+06	0.370827	29.9672	2.30652	3.22581	0.0931158	0.861116	30.3309	42.9348
	灌木	红花继木	40	2.49	[12]王芳. 基于叶面积指数的群落固碳释氧和降温增湿功能研究[D].华中农业大学,2013.	1	0.785398	3.23	2.35	185.861	[8]康华靖,王艳英,王令俐,李红.基于单木模型对温州常见城市绿化树种固碳增湿能力的比较[J].中南林业科技大学学报,2017,37(07):78-84+98.[7]王芳. 基于叶面积指数的群落固碳释氧和降温增湿功能研究[D].华中农业大学,2013.	8.0427	5.8515	6.31672	4.59576	252.669	183.83	3345.5	8.10673e+06	0.537867	29.8001	3.3455	4.67889	0.13506	0.90306	4.24304	43.5215
		紫薇	120	2.98	[12]王芳. 基于叶面积指数的群落固碳释氧和降温增湿功能研究[D].华中农业大学,2013.	1.2	1.13097	7.3	5.31	51.56	[5]陈自新,苏雪痕,刘少宗,古润泽,李延明.北京城市园林绿化生态效益的研究(2)【J】.中国园林,1998(02).[7]王芳. 基于叶面积指数的群落固碳释氧和降温增湿功能研究[D].华中农业大学,2013.	21.754	15.8238	24.6032	17.8963	2952.38	2147.56	928.08	2.2489e+06	0.149211	30.1888	0.92808	1.29798	0.0374672	0.805467	5.08493	42.1564
		山茶	40	2.82	[3]姚侠妹,偶春,夏璐,姚晓洁,陈媛媛,王宁馨.安徽沿淮地区小城镇主要景观树种固碳释氧和降温增湿效益评估[J].生态学杂志,2021,40(05):1293-1304.	1.88	2.77591	4.83	3.51	63.6	[3]姚侠妹,偶春,夏璐,姚晓洁,陈媛媛,王宁馨.安徽沿淮地区小城镇主要景观树种固碳释氧和降温增湿效益评估[J].生态学杂志,2021,40(05):1293-1304.	13.6206	9.8982	37.8096	27.4765	1512.38	1099.06	1144.8	2.77405e+06	0.184053	30.1539	1.1448	1.60107	0.0462164	0.814216	5.1317	42.2788
		杜鹃	100	3.45	[12]王芳. 基于叶面积指数的群落固碳释氧和降温增湿功能研究[D].华中农业大学,2013.	0.8	0.502655	1.89	1.37	89.6	[7]王芳. 基于叶面积指数的群落固碳释氧和降温增湿功能研究[D].华中农业大学,2013. [9]朱燕青. 常见灌木固碳释氧及降温增湿效应研究[D].中南林业科技大学,2013.	6.5205	4.7265	3.27756	2.3758	327.756	237.58	1612.8	3.9081e+06	0.259295	30.0787	1.6128	2.2556	0.0651099	0.83311	3.27278	42.5431
乔灌草	乔木	梧桐	10	9.26	[1]李冰冰. 长沙市常见行道树固碳释氧滞尘效益研究[D].中南林业科技大学,2012.	3	7.06858	6.86	4.99	50.8	[2]杨清. 煤矿复垦区绿化树种固碳释氧、降温增湿效应研究[D].安徽理工大学,2013. [3]李冰冰. 长沙市常见行道树固碳释氧滞尘效益研究[D].中南林业科技大学,2012.	63.5236	46.2074	449.022	326.621	4490.22	3266.21	914.4	2.21575e+06	0.147011	30.191	0.9144	1.27885	0.036915	0.804915	2.60937	42.1487
		石楠	40	3.11	[3]姚侠妹,偶春,夏璐,姚晓洁,陈媛媛,王宁馨.安徽沿淮地区小城镇主要景观树种固碳释氧和降温增湿效益评估[J].生态学杂志,2021,40(05):1293-1304.	0.8	0.502655	13.51	9.83	132.149	[4]姚侠妹,偶春,夏璐,姚晓洁,陈媛媛,王宁馨.安徽沿淮地区小城镇主要景观树种固碳释氧和降温增湿效益评估[J].生态学杂志,2021,40(05):1293-1304.	42.0161	30.5713	21.1196	15.3668	844.784	614.672	2378.68	5.76397e+06	0.382429	29.9556	2.37868	3.32673	0.0960291	0.864029	1.93078	42.9756
	灌木	紫薇	40	2.98	[12]王芳. 基于叶面积指数的群落固碳释氧和降温增湿功能研究[D].华中农业大学,2013.	1.2	1.13097	7.3	5.31	51.56	[5]陈自新,苏雪痕,刘少宗,古润泽,李延明.北京城市园林绿化生态效益的研究(2)【J】.中国园林,1998(02).[7]王芳. 基于叶面积指数的群落固碳释氧和降温增湿功能研究[D].华中农业大学,2013.	21.754	15.8238	24.6032	17.8963	984.128	715.852	928.08	2.2489e+06	0.149211	30.1888	0.92808	1.29798	0.0374672	0.805467	1.69498	42.1564
		海桐	40	2.75	[12]王芳. 基于叶面积指数的群落固碳释氧和降温增湿功能研究[D].华中农业大学,2013.	0.8	0.502655	3.64	2.91	56.27	[2]杨清. 煤矿复垦区绿化树种固碳释氧、降温增湿效应研究[D].安徽理工大学,2013. [7]王芳. 基于叶面积指数的群落固碳释氧和降温增湿功能研究[D].华中农业大学,2013.	10.01	8.0025	5.03157	4.0225	201.263	160.9	1012.86	2.45434e+06	0.162841	30.1752	1.01286	1.41655	0.0408899	0.80889	0.82214	42.2043
		桂花	40	3.18	[3]姚侠妹,偶春,夏璐,姚晓洁,陈媛媛,王宁馨.安徽沿淮地区小城镇主要景观树种固碳释氧和降温增湿效益评估[J].生态学杂志,2021,40(05):1293-1304.	2.55	5.10705	8.48	6.17	103.22	[4]姚侠妹,偶春,夏璐,姚晓洁,陈媛媛,王宁馨.安徽沿淮地区小城镇主要景观树种固碳释氧和降温增湿效益评估[J].生态学杂志,2021,40(05):1293-1304.	26.9664	19.6206	137.719	100.203	5508.75	4008.14	1857.96	4.50217e+06	0.298711	30.0393	1.85796	2.59847	0.0750071	0.843007	15.3226	42.6815
		锦带	40	3.14	[12]王芳. 基于叶面积指数的群落固碳释氧和降温增湿功能研究[D].华中农业大学,2013.	0.6	0.282743	2.89	2.1	22.1	[2]杨清. 煤矿复垦区绿化树种固碳释氧、降温增湿效应研究[D].安徽理工大学,2013. [7]王芳. 基于叶面积指数的群落固碳释氧和降温增湿功能研究[D].华中农业大学,2013.	9.0746	6.594	2.56578	1.86441	102.631	74.5764	397.8	963940	0.0639557	30.274	0.3978	0.556348	0.0160595	0.784059	0.181628	41.857
	草本	鸢尾	1200	4.11	[1]熊向艳,韩永伟,高馨婷,尚洪磊,郑烨,王宝良.北京市城乡结合部17种常用绿化植物固碳释氧功能研究[J].环境工程技术学报,2014,4(03):248-255.	0.15	0.0176715	6.34	4.61	0.04	[12]宋卓琴, et al."太原市主要园林植物春季固碳释氧和降温增湿效应." 山西农业科学 46.10(2018):1685-1690+1729.[13]熊向艳,韩永伟,高馨婷,尚洪磊,郑烨,王宝良.北京市城乡结合部17种常用绿化植物固碳释氧功能研究[J].环境工程技术学报,2014,4(03):247-255.	26.0574	18.9471	0.460472	0.334823	552.567	401.787	0.72	1744.69	0.000115757	30.3379	0.00072	0.00100696	2.90669e-05	0.768029	0.000616386	41.6328
		麦冬	1700	5.02	[6]郭鹏,丁向阳,勇浩,张机伟.南阳市三种常见草坪地被植物生态效益研究[J].河南林业科技,2005(04):17-19.	0.2	0.0314159	6.14	4.45	0.02	[12]宋卓琴, et al."太原市主要园林植物春季固碳释氧和降温增湿效应." 山西农业科学 46.10(2018):1685-1690+1729.[11]郭鹏,丁向阳,勇浩,张机伟.南阳市三种常见草坪地被植物生态效益研究[J].河南林业科技,2005(04):17-19.	30.8228	22.339	0.968327	0.7018	1646.16	1193.06	0.36	872.344	5.78784e-05	30.3379	0.00036	0.000503482	1.45335e-05	0.768015	0.000776189	41.6326
																				0.155876	30.1821			0.039141	0.807141	5.32992

## Sheet: 不同日期舒适度计算
					579.558		23.7.1(30.60)	新T=30.44	ex=43.53	新湿度=0.44	新风速	578.811		23.7.7	新T=31.75	ex=46.88	新湿度=0.62	新风速	580.008		23 .7.14	新T=29.65	ex=41.63	新温度=0.66	新风速	580.527		23.7.22	新T=28.74	ex=39.49	新湿度=0.58	新风速	579.707		30.338			579.632			新T=30.31	ex=43.21
兴趣区	种类	名称	日蒸腾质量WH2O	Δa	7.1QL=579.56	T差	新T	Δe	Δf			7.7QL=578.81	T差	新T	Δe	Δf			7.14QL=580.01	T差	新T	Δe	Δf			22QL=580.53	T差	新T	Δe	Δf		WBGT	AVRQL=579.71	T差	新T			29QL=579.63	T差	新T	Δe	Δf
乔木		合欢	979.92	0.97992	2.37391e+06	0.157504	30.4425	1.37096	0.0314946			2.37085e+06	0.157302	31.7527	1.37688	0.0293702			2.37575e+06	0.157627	29.6524	1.36739	0.0328463			2.37788e+06	0.157768	28.7422	1.36328	0.0345222			2.37452e+06	0.157545	30.1805			2.37421e+06	0.157525	30.3125	1.37037	0.0317142
		刺槐	1146.96	1.14696	2.77857e+06	0.184353	30.4156	1.60466	0.0368632			2.77499e+06	0.184116	31.7259	1.61158	0.0343767			2.78073e+06	0.184496	29.6255	1.60048	0.0384453			2.78322e+06	0.184661	28.7153	1.59567	0.0404069			2.77929e+06	0.184401	30.1536			2.77893e+06	0.184377	30.2856	1.60397	0.0371203
草本		鸢尾	0.72	0.00072	1744.24	0.000115727	30.5999	0.00100732	2.31408e-05			1741.99	0.000115578	31.9099	0.00101166	2.15799e-05			1745.59	0.000115817	29.8099	0.0010047	2.41339e-05			1747.15	0.000115921	28.8999	0.00100168	2.53653e-05			1744.69	0.000115757	30.3379			1744.46	0.000115742	30.4699	0.000906304	2.09744e-05
		麦冬	0.36	0.00036	872.119	5.78635e-05	30.5999	0.000503659	1.15704e-05			870.995	5.7789e-05	31.9099	0.000505832	1.07899e-05			872.796	5.79085e-05	29.8099	0.000502348	1.2067e-05			873.577	5.79603e-05	28.8999	0.000500838	1.26826e-05			872.344	5.78784e-05	30.3379			872.23	5.78709e-05	30.4699	0.000453152	1.04872e-05
		结缕草	3.24	0.00324	7849.07	0.000520772	30.5995	0.00453293	0.000104133			7838.96	0.000520101	31.9095	0.00455249	9.71094e-05			7855.17	0.000521176	29.8095	0.00452113	0.000108603			7862.19	0.000521642	28.8995	0.00450754	0.000114144			7851.09	0.000520906	30.3375			7850.07	0.000520838	30.4695	0.00407837	9.43848e-05
乔草	乔木	银杏	796.806	0.796806	1.9303e+06	0.128072	30.4719	1.11477	0.0256093			1.92782e+06	0.127907	31.7821	1.11958	0.0238819			1.9318e+06	0.128172	29.6818	1.11187	0.0267084			1.93353e+06	0.128286	28.7717	1.10853	0.0280711			1.9308e+06	0.128105	30.2099			1.93055e+06	0.128089	30.3419	1.00298	0.0232119
		广玉兰	1561.86	1.56186	3.78369e+06	0.251041	30.349	2.18512	0.0501981			3.77881e+06	0.250717	31.6593	2.19455	0.0468121			3.78663e+06	0.251236	29.5588	2.17944	0.0523525			3.79001e+06	0.251461	28.6485	2.17288	0.0550237			3.78466e+06	0.251106	30.0869			3.78417e+06	0.251073	30.2189	1.966	0.0454987
	草本	鸢尾	0.72	0.00072	1744.24	0.000115727	30.5999	0.00100732	2.31408e-05			1741.99	0.000115578	31.9099	0.00101166	2.15799e-05			1745.59	0.000115817	29.8099	0.0010047	2.41339e-05			1747.15	0.000115921	28.8999	0.00100168	2.53653e-05			1744.69	0.000115757	30.3379			1744.46	0.000115742	30.4699	0.000906304	2.09744e-05
		麦冬	0.36	0.00036	872.17	5.78669e-05	30.5999	0.000503659	1.15704e-05			870.995	5.7789e-05	31.9099	0.000505832	1.07899e-05			872.796	5.79085e-05	29.8099	0.000502348	1.2067e-05			873.577	5.79603e-05	28.8999	0.000500838	1.26826e-05			872.344	5.78784e-05	30.3379			872.23	5.78709e-05	30.4699	0.000453152	1.04872e-05
乔灌	乔木	合欢	979.92	0.97992	2.37391e+06	0.157504	30.4425	1.37096	0.0314946			2.37085e+06	0.157302	31.7527	1.37688	0.0293702			2.37575e+06	0.157627	29.6524	1.36739	0.0328463			2.37788e+06	0.157768	28.7422	1.36328	0.0345222			2.37452e+06	0.157545	30.1805			2.37421e+06	0.157525	30.3125	1.23348	0.0285462
		垂丝海棠	2306.52	2.30652	5.58767e+06	0.370732	30.2293	3.22694	0.0741314			5.58047e+06	0.370254	31.5397	3.24087	0.0691311			5.59201e+06	0.37102	29.439	3.21854	0.077313			5.59701e+06	0.371351	28.5286	3.20887	0.0812577			5.58911e+06	0.370827	26.2792			5.58838e+06	0.370779	30.0992	2.90335	0.0671915
	灌木	红花继木	3345.5	3.3455	8.10464e+06	0.537729	30.0623	4.68052	0.107524			8.0942e+06	0.537036	31.373	4.70072	0.100271			8.11094e+06	0.538146	29.2719	4.66834	0.112139			8.1182e+06	0.538628	28.3614	4.65431	0.11786			8.10673e+06	0.537867	26.1121			8.10568e+06	0.537797	29.9322	4.21116	0.0974581
		紫薇	928.08	0.92808	2.24832e+06	0.149172	30.4508	1.29843	0.0298284			2.24543e+06	0.14898	31.761	1.30404	0.0278165			2.25007e+06	0.149288	29.6607	1.29505	0.0311086			2.25208e+06	0.149422	28.7506	1.29116	0.0326959			2.2489e+06	0.149211	26.5008			2.24861e+06	0.149191	30.3208	1.16823	0.027036
		山茶	1144.8	1.1448	2.77334e+06	0.184006	30.416	1.60163	0.0367938			2.76976e+06	0.183769	31.7262	1.60855	0.034312			2.77549e+06	0.184149	29.6259	1.59747	0.0383729			2.77797e+06	0.184314	28.7157	1.59266	0.0403308			2.77405e+06	0.184053	26.4659			2.77369e+06	0.184029	30.286	1.44102	0.0333493
		杜鹃	1612.8	1.6128	3.90709e+06	0.259229	30.3408	2.25639	0.0518353			3.90206e+06	0.258895	31.6511	2.26613	0.0483389			3.91013e+06	0.25943	29.5506	2.25052	0.05406			3.91363e+06	0.259662	28.6403	2.24375	0.0568183			3.9081e+06	0.259295	26.3907			3.90759e+06	0.259262	30.2107	2.03012	0.0469827
乔灌草	乔木	梧桐	914.4	0.9144	2.21518e+06	0.146973	30.453	1.27929	0.0293888			2.21233e+06	0.146784	31.7632	1.28481	0.0274064			2.2169e+06	0.147088	29.6629	1.27596	0.0306501			2.21889e+06	0.147219	28.7528	1.27213	0.0322139			2.21575e+06	0.147011	26.503			2.21547e+06	0.146992	30.323	1.15101	0.0266375
		石楠	2378.68	2.37868	5.76248e+06	0.38233	30.2177	3.3279	0.0768568			5.75506e+06	0.381838	31.5282	3.34226	0.071294			5.76696e+06	0.382627	29.4274	3.31924	0.0797319			5.77212e+06	0.38297	28.517	3.30926	0.0838			5.76397e+06	0.382429	26.2676			5.76322e+06	0.382379	30.0876	2.99418	0.0692937
	灌木	紫薇	928.08	0.92808	2.24832e+06	0.149172	30.4508	1.29843	0.0298284			2.24543e+06	0.14898	31.761	1.30404	0.0278165			2.25007e+06	0.149288	29.6607	1.29505	0.0311086			2.25208e+06	0.149422	28.7506	1.29116	0.0326959			2.2489e+06	0.149211	26.5008			2.24861e+06	0.149191	30.3208	1.16823	0.027036
		海桐	1012.86	1.01286	2.45371e+06	0.162799	30.4372	1.41704	0.0325533			2.45055e+06	0.162589	31.7474	1.42316	0.0303575			2.45561e+06	0.162925	29.6471	1.41336	0.0339504			2.45781e+06	0.163071	28.7369	1.40911	0.0356826			2.45434e+06	0.162841	26.4872			2.45402e+06	0.16282	30.3072	1.27494	0.0295057
		桂花	1857.96	1.85796	4.50101e+06	0.298634	30.3014	2.59938	0.0597147			4.49521e+06	0.298249	31.6118	2.6106	0.0556869			4.5045e+06	0.298866	29.5111	2.59262	0.0622776			4.50853e+06	0.299133	28.6009	2.58482	0.0654552			4.50217e+06	0.298711	26.3513			4.50158e+06	0.298672	30.1713	2.33872	0.0541245
		锦带	397.8	0.3978	963691	0.0639392	30.5361	0.556543	0.0127853			962450	0.0638568	31.8461	0.558944	0.0119229			964440	0.0639889	29.746	0.555094	0.013334			965303	0.0640461	28.836	0.553426	0.0140143			963940	0.0639557	26.586			963815	0.0639474	30.4061	0.500733	0.0115884
	草本	鸢尾	0.72	0.00072	1744.24	0.000115727	30.5999	0.00100732	2.31408e-05			1741.99	0.000115578	31.9099	0.00101166	2.15799e-05			1745.59	0.000115817	29.8099	0.0010047	2.41339e-05			1747.15	0.000115921	28.8999	0.00100168	2.53653e-05			1744.69	0.000115757	26.6499			1744.46	0.000115742	30.4699	0.000906304	2.09744e-05
		麦冬	0.36	0.00036	872.119	5.78635e-05	30.5999	0.000503659	1.15704e-05			870.995	5.7789e-05	31.9099	0.000505832	1.07899e-05			872.796	5.79085e-05	29.8099	0.000502348	1.2067e-05			873.577	5.79603e-05	28.8999	0.000500838	1.26826e-05			872.344	5.78784e-05	26.6499			872.23	5.78709e-05	30.4699	0.000453152	1.04872e-05
							30.4442		0.0311786					31.7544		0.0290591					29.654		0.0324984					28.7439		0.0341565										30.3141

## Sheet: 不同日期
	新T	lnex	ex	湿度		新湿度	风速（m/s）	新风速	wbgt
7日	30.38	3.7643	43.1336	0.41	0.03	0.44	3.04	1.6112	42.0839
14日	26.59	3.54154	34.52	0.58	0.04	0.62	3.25	1.7225	43.4719
21日	20.93	3.19817	24.4877	0.61	0.05	0.66	1.65	0.8745	18.1213
30日	28.05	3.62802	37.6381	0.54	0.04	0.58	2.29	1.2137	31.5205
				WBGT=(0.8288Ta+0.0613Tmr+0.007377SR+13.8297RH-8.7284)V-0.0551

## Sheet: 论文用
种类	名称	叶面积指数LAI	单位固碳量WCO2(g/(m²·d))	单位释氧量WO2(g/(m²·d))	总蒸腾量mmol/（m2·d）	参考文献
乔木	刺槐	4.56	22.39	16.28	63.72	[1]杨清. 煤矿复垦区绿化树种固碳释氧、降温增湿效应研究[D].安徽理工大学,2013. [2]徐玮玮. 扬州古运河生态环境林绿地树种配置及环境效应研究[D].扬州大学,2007.
	石楠	3.11	13.51	9.83	132.149	[4]姚侠妹,偶春,夏璐,姚晓洁,陈媛媛,王宁馨.安徽沿淮地区小城镇主要景观树种固碳释氧和降温增湿效益评估[J].生态学杂志,2021,40(05):1293-1304.
	垂丝海棠	2.64	10.23	7.44	128.14	[4]姚侠妹,偶春,夏璐,姚晓洁,陈媛媛,王宁馨.安徽沿淮地区小城镇主要景观树种固碳释氧和降温增湿效益评估[J].生态学杂志,2021,40(05):1293-1304.
	梧桐	9.26	6.86	4.99	50.8	[2]杨清. 煤矿复垦区绿化树种固碳释氧、降温增湿效应研究[D].安徽理工大学,2013. [3]李冰冰. 长沙市常见行道树固碳释氧滞尘效益研究[D].中南林业科技大学,2012.
	银杏	3.17	6.61	4.41	44.267	[4]姚侠妹,偶春,夏璐,姚晓洁,陈媛媛,王宁馨.安徽沿淮地区小城镇主要景观树种固碳释氧和降温增湿效益评估[J].生态学杂志,2021,40(05):1293-1304.
	广玉兰	2.83	6.29	4.57	86.77	[4]姚侠妹,偶春,夏璐,姚晓洁,陈媛媛,王宁馨.安徽沿淮地区小城镇主要景观树种固碳释氧和降温增湿效益评估[J].生态学杂志,2021,40(05):1293-1304.
	合欢	1.46	3.67	3.27	54.44	[5]陈自新,苏雪痕,刘少宗,古润泽,李延明.北京城市园林绿化生态效益的研究(2)【J】.中国园林,1998(02).[6]郭晖,周慧,张家洋.郑州市15种常见园林树种固碳释氧能力分析研究[J].西北林学院学报,2017,32(04):52-56.
灌木	桂花	3.18	8.48	6.17	103.22	[4]姚侠妹,偶春,夏璐,姚晓洁,陈媛媛,王宁馨.安徽沿淮地区小城镇主要景观树种固碳释氧和降温增湿效益评估[J].生态学杂志,2021,40(05):1293-1304.
	紫薇	2.98	7.3	5.31	51.56	[5]陈自新,苏雪痕,刘少宗,古润泽,李延明.北京城市园林绿化生态效益的研究(2)【J】.中国园林,1998(02).[7]王芳. 基于叶面积指数的群落固碳释氧和降温增湿功能研究[D].华中农业大学,2013.
	山茶	2.82	4.83	3.51	63.6	[3]姚侠妹,偶春,夏璐,姚晓洁,陈媛媛,王宁馨.安徽沿淮地区小城镇主要景观树种固碳释氧和降温增湿效益评估[J].生态学杂志,2021,40(05):1293-1304.
	海桐	2.75	3.64	2.91	56.27	[2]杨清. 煤矿复垦区绿化树种固碳释氧、降温增湿效应研究[D].安徽理工大学,2013. [7]王芳. 基于叶面积指数的群落固碳释氧和降温增湿功能研究[D].华中农业大学,2013.
	红花继木	2.49	3.23	2.35	185.861	[8]康华靖,王艳英,王令俐,李红.基于单木模型对温州常见城市绿化树种固碳增湿能力的比较[J].中南林业科技大学学报,2017,37(07):78-84+98.[7]王芳. 基于叶面积指数的群落固碳释氧和降温增湿功能研究[D].华中农业大学,2013.
	锦带	3.14	2.89	2.1	22.1	[2]杨清. 煤矿复垦区绿化树种固碳释氧、降温增湿效应研究[D].安徽理工大学,2013. [7]王芳. 基于叶面积指数的群落固碳释氧和降温增湿功能研究[D].华中农业大学,2013.
	杜鹃	3.45	1.89	1.37	89.6	[7]王芳. 基于叶面积指数的群落固碳释氧和降温增湿功能研究[D].华中农业大学,2013. [9]朱燕青. 常见灌木固碳释氧及降温增湿效应研究[D].中南林业科技大学,2013.
草本	结缕草	10.24	4.53	3.3	0.18	[10]李辉,赵卫智.北京5种草坪地被植物生态效益的研究[J].中国园林,1998(04):34-36. [11]郭鹏,丁向阳,勇浩,张机伟.南阳市三种常见草坪地被植物生态效益研究[J].河南林业科技,2005(04):17-19.
	鸢尾	4.11	6.34	4.61	0.04	[12]宋卓琴, et al."太原市主要园林植物春季固碳释氧和降温增湿效应." 山西农业科学 46.10(2018):1685-1690+1729.[13]熊向艳,韩永伟,高馨婷,尚洪磊,郑烨,王宝良.北京市城乡结合部17种常用绿化植物固碳释氧功能研究[J].环境工程技术学报,2014,4(03):247-255.
	麦冬	5.02	6.14	4.45	0.02	[12]宋卓琴, et al."太原市主要园林植物春季固碳释氧和降温增湿效应." 山西农业科学 46.10(2018):1685-1690+1729.[11]郭鹏,丁向阳,勇浩,张机伟.南阳市三种常见草坪地被植物生态效益研究[J].河南林业科技,2005(04):17-19.

## Sheet: 计算人体舒适度
日期	温度	湿度	风速（m/s）	WBGT	WBGT种植后		RH	袁WBGT（sr=0.9）	种后WBGT		种植后温度	种植后湿度	风速
2023.7.1	30.6	0.76	2.75	84.5764	42.08		41	26.5669	26.8865		30.4442	44	1.4575
2023.7.7	31.91	0.73	5.72	180.275	43.47		58	29.7365	30.27		31.7544	62	3.0316
2023.7.14	29.81	0.76	3.35	100.686	18.12		61	28.3463	28.9139		29.654	66	1.7755
2023.7.22	28.9	0.84	2.8	84.9762	31.52		54	26.6943	28.5356		30.3141	58	1.484
2023.7.29	30.47	0.75	2.17	66.1757			54	28.1318	28.6521		30.5417	57.5	1.93715
平均	30.338	0.768	3.358	102.876			58	28.45
	30.178		3				68	29.6465
	32.09		3				68	31.4315
									[0.8288*(26.65-a)+0.0613*(26.65-a)+0.007377*238.02+13.8297*(0.54+b)-8.7284]*1.36-0.0551
WBGT=(0.8288Ta+0.0613Tmr+0.007377SR+13.8297RH-8.7284)V-0.0551
	防风系数 0.47
	[1]汪大林. 淮河河道防护林小气候及其防护效应的研究[D].安徽农业大学,2012.
	袁WBGT=0.735Ta+0.0374RH+0.00292(Ta*RH)+7.619SR−4.557SR*SR−0.0572v−4.064

## Sheet: 天气
日期	温度	湿度	风速（m/s）	L = 597－0.57×t	Δe	ex
2023.7.1	30.6	0.76	2.75	579.558
2023.7.7	31.91	0.73	5.72	578.811
2023.7.14	29.81	0.76	3.35	580.008
2023.7.22	28.9	0.84	2.8	580.527
2023.7.29	30.47	0.75	2.17	579.632
	30.338	0.768	3.358
	L = 597－0.57×t		579.707
	ex=34.643

[truncated: 8 more sheets: Sheet1, Sheet2, 最后总表, 对比表, 图2, 前期固碳, 固碳释氧量, Sheet3]
