# Supplementary material for: Study on the Influence Mechanism of Human Thermal Comfort Models in Plant Cultivation Simulation and Microclimate Regulation
Source: Research Square preprint supplement (doi:10.21203/rs.3.rs-7648784/v1), 2025-11-06
Supplement: Supplementary file 2 [file e3f4c2deb4299ecf986f0929.xlsx]

## Sheet: 乔木
植物类型	种名	植物图鉴	WCO2(g/(m²·d))	WO2(g/(m²·d))	LAI	QCO2(g/(m²·d))	QO2(g/(m²·d))	冠幅（m）	垂直投影面积（ΠD²/4）	M固碳量	M释氧量	固碳释氧数据引用文献	lai数据引用文献	种植1区	种植2区	种植3区
乔木	合欢	=DISPIMG("ID_F80B938F968E4079B3F74600AFB23C8C",1)	167.18	148.96	4.12	688.782	613.715	4	12.5664	8655.48	7712.17		[1]赵萱,李海梅.11种地被植物固碳释氧与降温增湿效益研究[J].江西农业学报,2009,21(01):44-47.	5		69
	刺槐	=DISPIMG("ID_155177BC988D4BEFB9874ED8D5547431",1)	102.09	74.25	4.56	465.53	338.58	3	7.06858	3290.64	2393.28		[2]冯晶红,刘德富,吴耕华,刘煜,秦东旭,王可健,刘瑛. 三峡库区消落带适生植物固碳释氧能力研究[J]. 水生态学杂志,2020,41(01):1-8	4
	梧桐	=DISPIMG("ID_54D4C18BAE414C5CA6D7FA60C26BA889",1)	22.4	12.7	5.54	124.096	70.358	3	7.06858	877.182	497.331		[4]史红文,秦泉,廖建雄,陈桂桥,丁昭全. 武汉市10种优势园林植物固碳释氧能力研究[J]. 中南林业科技大学学报,2011,31(09):87-90
	樟树	=DISPIMG("ID_E5C45F99519D416FBE53864F509A88A0",1)	9.19	6.68	4.24	38.9656	28.3232	3.5	9.62112	374.893	272.501
	白玉兰		9.05	6.58	2.13	19.2765	14.0154	4.5	15.9043	306.579	222.905
	栾树	=DISPIMG("ID_461D33A837FA40619B8B4B6264510387",1)	15.86	11.53	4.534	71.9092	52.277	2	3.14159	225.909	164.233		[7]于雅鑫. 12种木兰科乔木的固碳释氧和降温增湿能力及景观评价研究[D].中南林业科技大学,2013
	银杏	=DISPIMG("ID_3C2AB329E1FC4C439A59E7646DE69456",1)	6.38	4.64	2.491	15.8926	11.5582	4	12.5664	199.712	145.245			23（7+7+9）

## Sheet: 灌木
植物类型	种名	植物图鉴	WCO2(g/(m²·d))	WO2(g/(m²·d))	LAI	QCO2(g/(m²·d))	QO2(g/(m²·d))	冠幅（m）	垂直投影面积（ΠD²/4）	M固碳量	M释氧量	数据引用文献	种植1区	种植2区	种植3区
灌木	红花檵木	=DISPIMG("ID_0E1CBF81F8EF4785BEC8B9E7E30DA92B",1)	64.91	47.21	3.16	205.116	149.184	1	0.785397	161.097	117.168		2
	紫薇	=DISPIMG("ID_C32E4859EBE446D0AD011E1296DEAA66",1)	19.97	14.52	2.978	59.4707	43.2406	1.2	1.13097	67.2597	48.9039
	海桐	=DISPIMG("ID_9EF8612409464CD78B6745656C42BB28",1)	28.53	20.75	2.748	78.4004	57.021	0.8	0.502654	39.4083	28.6619
	石楠	=DISPIMG("ID_F4EC41F881034633AFBEEB697A5260C0",1)	8.12	5.9	4.637	37.6524	27.3583	0.8	0.502654	18.9262	13.7518
	锦带	=DISPIMG("ID_C2A2C1DD40104F489678AEF513B42557",1)	9.06	6.59	3.14	28.4484	20.6926	0.6	0.282743	8.04359	5.85069		4
	紫藤	=DISPIMG("ID_03BA4F5756954515BE213A193AE816D1",1)	15.67	11.39	2.12	33.2204	24.1468	0.5	0.196349	6.5228	4.74121
	杜鹃	=DISPIMG("ID_4D8703B5FBBE472A93D872B4D89C9F9E",1)	14.77	10.74	3.97	58.6369	42.6378	0.1	0.00785397	0.460533	0.334876		8

## Sheet: 草本
植物类型	种名	植物图鉴	WCO2(g/(m²·d))	WO2(g/(m²·d))	LAI	QCO2(g/(m²·d))	QO2(g/(m²·d))	冠幅（m）	垂直投影面积（ΠD²/4）	M固碳量	M释氧量	数据引用文献	种植1区	种植2区	种植3区
	鸢尾	=DISPIMG("ID_655F95192CFC42378CB0B6587B3198C5",1)	6.34	4.61	4.11	26.0574	18.9471	0.15	0.0176714	0.460472	0.334823		46
	冬麦				5.02							南阳市三种常见草坪地被植物生态效益研究/郭鹏	292
	狗尾草	=DISPIMG("ID_E523F08B082741769FF4708A260F5DE6",1)	0.4	0.3	1.47	0.588	0.441	0.35	0.0962112	0.0565722	0.0424291

## Sheet: 蒸腾
名称	总蒸腾量mmol/（m2·d）	文献
合欢	54.44	陈自新,苏雪痕,刘少宗,古润泽,李延明.北京城市园林绿化生态效益的研究(2)【J】.中国园林,1998(02).
刺槐	63.72	[2]杨清. 煤矿复垦区绿化树种固碳释氧、降温增湿效应研究[D].安徽理工大学,2013.
梧桐	50.8	[2]杨清. 煤矿复垦区绿化树种固碳释氧、降温增湿效应研究[D].安徽理工大学,2013.
樟树	5424.78	[4]康华靖,王艳英,王令俐,李红.基于单木模型对温州常见城市绿化树种固碳增湿能力的比较[J].中南林业科技大学学报,2017,37(07):78-84+98.
白玉兰	87725	[5]邵永昌,张金池,孙永涛,李娟娟,庄家尧,李二焕,薛雪.上海主要绿化树种夏季蒸腾特性与降温增湿功能比较[J].中国水土保持科学,2015,13(06):83-90.
广玉兰	86.77	[3]姚侠妹,偶春,夏璐,姚晓洁,陈媛媛,王宁馨.安徽沿淮地区小城镇主要景观树种固碳释氧和降温增湿效益评估[J].生态学杂志,2021,40(05):1293-1304.
栾树	38606	[6]邵永昌,张金池,孙永涛,李娟娟,庄家尧,李二焕,薛雪.上海主要绿化树种夏季蒸腾特性与降温增湿功能比较[J].中国水土保持科学,2015,13(06):83-90.
银杏	44.267	[13]姚侠妹,偶春,夏璐,姚晓洁,陈媛媛,王宁馨.安徽沿淮地区小城镇主要景观树种固碳释氧和降温增湿效益评估[J].生态学杂志,2021,40(05):1293-1304.
红花檵木	185.861	[8]康华靖,王艳英,王令俐,李红.基于单木模型对温州常见城市绿化树种固碳增湿能力的比较[J].中南林业科技大学学报,2017,37(07):78-84+98.
紫薇	53.54	陈自新,苏雪痕,刘少宗,古润泽,李延明.北京城市园林绿化生态效益的研究(2)【J】.中国园林,1998(02).
海桐	56.27	[2]杨清. 煤矿复垦区绿化树种固碳释氧、降温增湿效应研究[D].安徽理工大学,2013.
石楠	132.149	[3]姚侠妹,偶春,夏璐,姚晓洁,陈媛媛,王宁馨.安徽沿淮地区小城镇主要景观树种固碳释氧和降温增湿效益评估[J].生态学杂志,2021,40(05):1293-1304.
垂丝海棠	128.14	[3]姚侠妹,偶春,夏璐,姚晓洁,陈媛媛,王宁馨.安徽沿淮地区小城镇主要景观树种固碳释氧和降温增湿效益评估[J].生态学杂志,2021,40(05):1293-1304.
山茶	63.6	[3]姚侠妹,偶春,夏璐,姚晓洁,陈媛媛,王宁馨.安徽沿淮地区小城镇主要景观树种固碳释氧和降温增湿效益评估[J].生态学杂志,2021,40(05):1293-1304.
桂花	103.22	[3]姚侠妹,偶春,夏璐,姚晓洁,陈媛媛,王宁馨.安徽沿淮地区小城镇主要景观树种固碳释氧和降温增湿效益评估[J].生态学杂志,2021,40(05):1293-1304.
锦带	22.1	[12]杨清. 煤矿复垦区绿化树种固碳释氧、降温增湿效应研究[D].安徽理工大学,2013.
紫藤	51.56	陈自新,苏雪痕,刘少宗,古润泽,李延明.北京城市园林绿化生态效益的研究(2)【J】.中国园林,1998(02).
杜鹃	89.6	[14]朱燕青. 常见灌木固碳释氧及降温增湿效应研究[D].中南林业科技大学,2013.
鸢尾	0.04	[15]宋卓琴, et al."太原市主要园林植物春季固碳释氧和降温增湿效应." 山西农业科学 46.10(2018):1685-1690+1729.
麦冬	0.02	[15]宋卓琴, et al."太原市主要园林植物春季固碳释氧和降温增湿效应." 山西农业科学 46.10(2018):1685-1690+1729.
结缕草	0.18	[1]李辉,赵卫智.北京5种草坪地被植物生态效益的研究[J].中国园林,1998(04):34-36.
狗尾草	2.53mmol·m-2·s-1	黄刚,赵学勇,崔建垣,苏延桂.水分胁迫对2种科尔沁沙地植物光合和水分利用特性的影响【Z】.西北植物学报,2008(11):2306-2313.

## Sheet: 兴趣区 固碳差值
兴趣区	种类	名称	数量	叶面积指数LAI	lai文献	冠幅	垂直投影面积	单位固碳量WCO2(g/(m²·d))	单位释氧量WO2(g/(m²·d))	总蒸腾量mol/（m2·d）	固碳释氧文献	固碳量Q	释氧量Q	固碳量M	释氧量M	总量固碳	总量释氧	日蒸腾质量WH2O	吸热Q（J）	温度下降ΔT	新温度	Δa	Δe	单位叶片面积增加相对湿度	新湿度	增加相对湿度	WBGT
乔木		合欢	15	1.46	[1]郭晖,周慧,张家洋.郑州市15种常见园林树种固碳释氧能力分析研究[J].西北林学院学报,2017,32(04):52-56.	3.5	9.62113	3.67	3.27	54.44	[5]陈自新,苏雪痕,刘少宗,古润泽,李延明.北京城市园林绿化生态效益的研究(2)【J】.中国园林,1998(02).[6]郭晖,周慧,张家洋.郑州市15种常见园林树种固碳释氧能力分析研究[J].西北林学院学报,2017,32(04):52-56.	5.3582	4.7742	51.5519	45.9332	773.279	688.998	979.92	2.36929e+06	0.157198	32.4188	0.97992	1.38059	0.0398518	0.727852	5.75129	43.3961
		刺槐	20	4.56	[1]徐玮玮. 扬州古运河生态环境林绿地树种配置及环境效应研究[D].扬州大学,2007.	2.8	6.15752	22.39	16.28	63.72	[1]杨清. 煤矿复垦区绿化树种固碳释氧、降温增湿效应研究[D].安徽理工大学,2013. [2]徐玮玮. 扬州古运河生态环境林绿地树种配置及环境效应研究[D].扬州大学,2007.	102.098	74.2368	628.673	457.115	12573.5	9142.29	1146.96	2.77317e+06	0.183995	32.392	1.14696	1.61592	0.046645	0.734645	5.74436	43.4914
草本		鸢尾	800	4.11	[1]熊向艳,韩永伟,高馨婷,尚洪磊,郑烨,王宝良.北京市城乡结合部17种常用绿化植物固碳释氧功能研究[J].环境工程技术学报,2014,4(03):248-255.	0.15	0.0176715	6.34	4.61	0.04	[12]宋卓琴, et al."太原市主要园林植物春季固碳释氧和降温增湿效应." 山西农业科学 46.10(2018):1685-1690+1729.[13]熊向艳,韩永伟,高馨婷,尚洪磊,郑烨,王宝良.北京市城乡结合部17种常用绿化植物固碳释氧功能研究[J].环境工程技术学报,2014,4(03):247-255.	26.0574	18.9471	0.460472	0.334823	368.378	267.858	0.72	1740.85	0.000115502	32.5759	0.00072	0.00101439	2.92813e-05	0.688029	0.000413954	42.8373
		麦冬	1200	5.02	[6]郭鹏,丁向阳,勇浩,张机伟.南阳市三种常见草坪地被植物生态效益研究[J].河南林业科技,2005(04):17-19.	0.2	0.0314159	6.14	4.45	0.02	[12]宋卓琴, et al."太原市主要园林植物春季固碳释氧和降温增湿效应." 山西农业科学 46.10(2018):1685-1690+1729.[11]郭鹏,丁向阳,勇浩,张机伟.南阳市三种常见草坪地被植物生态效益研究[J].河南林业科技,2005(04):17-19.	30.8228	22.339	0.968327	0.7018	1161.99	842.16	0.36	870.424	5.77511e-05	32.5759	0.00036	0.000509392	1.4704e-05	0.688015	0.000554329	42.8371
		结缕草	1600	10.24	[2]冯晶红,刘德富,吴耕华,刘煜,秦东旭,王可健,刘瑛. 三峡库区消落带适生植物固碳释氧能力研究[J]. 水生态学杂志,2020,41(01):1-8	0.35	0.0962113	4.53	3.3	0.18	[10]李辉,赵卫智.北京5种草坪地被植物生态效益的研究[J].中国园林,1998(04):34-36. [11]郭鹏,丁向阳,勇浩,张机伟.南阳市三种常见草坪地被植物生态效益研究[J].河南林业科技,2005(04):17-19.	46.3872	33.792	4.46297	3.25117	7140.75	5201.87	3.24	7833.82	0.00051976	32.5755	0.00324	0.00456476	0.000131766	0.688132	0.0202837	42.8387
乔草	乔木	银杏	30	3.17	[3]姚侠妹,偶春,夏璐,姚晓洁,陈媛媛,王宁馨.安徽沿淮地区小城镇主要景观树种固碳释氧和降温增湿效益评估[J].生态学杂志,2021,40(05):1293-1304.	3.27	8.39818	6.61	4.41	44.267	[4]姚侠妹,偶春,夏璐,姚晓洁,陈媛媛,王宁馨.安徽沿淮地区小城镇主要景观树种固碳释氧和降温增湿效益评估[J].生态学杂志,2021,40(05):1293-1304.	20.9537	13.9797	175.973	117.404	5279.19	3522.12	796.806	1.92655e+06	0.127823	32.4482	0.796806	1.1226	0.0324048	0.720405	8.16425	43.2916
		广玉兰	30	2.83	[3]姚侠妹,偶春,夏璐,姚晓洁,陈媛媛,王宁馨.安徽沿淮地区小城镇主要景观树种固碳释氧和降温增湿效益评估[J].生态学杂志,2021,40(05):1293-1304.	3.89	11.8847	6.29	4.57	86.77	[4]姚侠妹,偶春,夏璐,姚晓洁,陈媛媛,王宁馨.安徽沿淮地区小城镇主要景观树种固碳释氧和降温增湿效益评估[J].生态学杂志,2021,40(05):1293-1304.	17.8007	12.9331	211.556	153.706	6346.69	4611.19	1561.86	3.77633e+06	0.250553	32.3254	1.56186	2.20047	0.0635184	0.751518	22.6469	43.7282
	草本	鸢尾	700	4.11	[1]熊向艳,韩永伟,高馨婷,尚洪磊,郑烨,王宝良.北京市城乡结合部17种常用绿化植物固碳释氧功能研究[J].环境工程技术学报,2014,4(03):248-255.	0.15	0.0176715	6.34	4.61	0.04	[12]宋卓琴, et al."太原市主要园林植物春季固碳释氧和降温增湿效应." 山西农业科学 46.10(2018):1685-1690+1729.[13]熊向艳,韩永伟,高馨婷,尚洪磊,郑烨,王宝良.北京市城乡结合部17种常用绿化植物固碳释氧功能研究[J].环境工程技术学报,2014,4(03):247-255.	26.0574	18.9471	0.460472	0.334823	322.331	234.376	0.72	1740.85	0.000115502	32.5759	0.00072	0.00101878	2.94081e-05	0.688029	0.000363778	42.8373
		麦冬	1600	5.02	[6]郭鹏,丁向阳,勇浩,张机伟.南阳市三种常见草坪地被植物生态效益研究[J].河南林业科技,2005(04):17-19.	0.2	0.0314159	6.14	4.45	0.02	[12]宋卓琴, et al."太原市主要园林植物春季固碳释氧和降温增湿效应." 山西农业科学 46.10(2018):1685-1690+1729.[11]郭鹏,丁向阳,勇浩,张机伟.南阳市三种常见草坪地被植物生态效益研究[J].河南林业科技,2005(04):17-19.	30.8228	22.339	0.968327	0.7018	1549.32	1122.88	0.36	870.424	5.77511e-05	32.5759	0.00036	0.000507195	1.46406e-05	0.688015	0.000735918	42.8371
乔灌	乔木	合欢	20	1.46	[1]郭晖,周慧,张家洋.郑州市15种常见园林树种固碳释氧能力分析研究[J].西北林学院学报,2017,32(04):52-56.	4	12.5664	3.67	3.27	54.44	[5]陈自新,苏雪痕,刘少宗,古润泽,李延明.北京城市园林绿化生态效益的研究(2)【J】.中国园林,1998(02).[6]郭晖,周慧,张家洋.郑州市15种常见园林树种固碳释氧能力分析研究[J].西北林学院学报,2017,32(04):52-56.	5.3582	4.7742	67.3331	59.9944	1346.66	1199.89	979.92	2.36929e+06	0.157198	32.4188	0.97992	1.38059	0.0398518	0.727852	10.0158	43.3961
		垂丝海棠	40	2.64	[3]姚侠妹,偶春,夏璐,姚晓洁,陈媛媛,王宁馨.安徽沿淮地区小城镇主要景观树种固碳释氧和降温增湿效益评估[J].生态学杂志,2021,40(05):1293-1304.	3.22	8.14332	10.23	7.44	128.14	[4]姚侠妹,偶春,夏璐,姚晓洁,陈媛媛,王宁馨.安徽沿淮地区小城镇主要景观树种固碳释氧和降温增湿效益评估[J].生态学杂志,2021,40(05):1293-1304.	27.0072	19.6416	219.928	159.948	8797.13	6397.92	2306.52	5.57681e+06	0.370011	32.206	2.30652	3.2496	0.0938025	0.781802	30.5546	44.1532
	灌木	红花继木	40	2.49	[12]王芳. 基于叶面积指数的群落固碳释氧和降温增湿功能研究[D].华中农业大学,2013.	1	0.785398	3.23	2.35	185.861	[8]康华靖,王艳英,王令俐,李红.基于单木模型对温州常见城市绿化树种固碳增湿能力的比较[J].中南林业科技大学学报,2017,37(07):78-84+98.[7]王芳. 基于叶面积指数的群落固碳释氧和降温增湿功能研究[D].华中农业大学,2013.	8.0427	5.8515	6.31672	4.59576	252.669	183.83	3345.5	8.08889e+06	0.536683	32.0393	3.3455	4.71339	0.136056	0.824056	4.27433	44.7462
		紫薇	120	2.98	[12]王芳. 基于叶面积指数的群落固碳释氧和降温增湿功能研究[D].华中农业大学,2013.	1.2	1.13097	7.3	5.31	51.56	[5]陈自新,苏雪痕,刘少宗,古润泽,李延明.北京城市园林绿化生态效益的研究(2)【J】.中国园林,1998(02).[7]王芳. 基于叶面积指数的群落固碳释氧和降温增湿功能研究[D].华中农业大学,2013.	21.754	15.8238	24.6032	17.8963	2952.38	2147.56	928.08	2.24395e+06	0.148882	32.4271	0.92808	1.30755	0.0377435	0.725744	5.12243	43.3665
		山茶	40	2.82	[3]姚侠妹,偶春,夏璐,姚晓洁,陈媛媛,王宁馨.安徽沿淮地区小城镇主要景观树种固碳释氧和降温增湿效益评估[J].生态学杂志,2021,40(05):1293-1304.	1.88	2.77591	4.83	3.51	63.6	[3]姚侠妹,偶春,夏璐,姚晓洁,陈媛媛,王宁馨.安徽沿淮地区小城镇主要景观树种固碳释氧和降温增湿效益评估[J].生态学杂志,2021,40(05):1293-1304.	13.6206	9.8982	37.8096	27.4765	1512.38	1099.06	1144.8	2.76795e+06	0.183648	32.3924	1.1448	1.61288	0.0465572	0.734557	5.16955	43.4902
		杜鹃	100	3.45	[12]王芳. 基于叶面积指数的群落固碳释氧和降温增湿功能研究[D].华中农业大学,2013.	0.8	0.502655	1.89	1.37	89.6	[7]王芳. 基于叶面积指数的群落固碳释氧和降温增湿功能研究[D].华中农业大学,2013. [9]朱燕青. 常见灌木固碳释氧及降温增湿效应研究[D].中南林业科技大学,2013.	6.5205	4.7265	3.27756	2.3758	327.756	237.58	1612.8	3.8995e+06	0.258725	32.3173	1.6128	2.27223	0.06559	0.75359	3.29691	43.7573
乔灌草	乔木	梧桐	10	9.26	[1]李冰冰. 长沙市常见行道树固碳释氧滞尘效益研究[D].中南林业科技大学,2012.	3	7.06858	6.86	4.99	50.8	[2]杨清. 煤矿复垦区绿化树种固碳释氧、降温增湿效应研究[D].安徽理工大学,2013. [3]李冰冰. 长沙市常见行道树固碳释氧滞尘效益研究[D].中南林业科技大学,2012.	63.5236	46.2074	449.022	326.621	4490.22	3266.21	914.4	2.21088e+06	0.146688	32.4293	0.9144	1.28828	0.0371872	0.725187	2.62861	43.3587
		石楠	40	3.11	[3]姚侠妹,偶春,夏璐,姚晓洁,陈媛媛,王宁馨.安徽沿淮地区小城镇主要景观树种固碳释氧和降温增湿效益评估[J].生态学杂志,2021,40(05):1293-1304.	0.8	0.502655	13.51	9.83	132.149	[4]姚侠妹,偶春,夏璐,姚晓洁,陈媛媛,王宁馨.安徽沿淮地区小城镇主要景观树种固碳释氧和降温增湿效益评估[J].生态学杂志,2021,40(05):1293-1304.	42.0161	30.5713	21.1196	15.3668	844.784	614.672	2378.68	5.75128e+06	0.381587	32.1944	2.37868	3.35127	0.0967372	0.784737	1.94502	44.1944
	灌木	紫薇	40	2.98	[12]王芳. 基于叶面积指数的群落固碳释氧和降温增湿功能研究[D].华中农业大学,2013.	1.2	1.13097	7.3	5.31	51.56	[5]陈自新,苏雪痕,刘少宗,古润泽,李延明.北京城市园林绿化生态效益的研究(2)【J】.中国园林,1998(02).[7]王芳. 基于叶面积指数的群落固碳释氧和降温增湿功能研究[D].华中农业大学,2013.	21.754	15.8238	24.6032	17.8963	984.128	715.852	928.08	2.24395e+06	0.148882	32.4271	0.92808	1.30755	0.0377435	0.725744	1.70748	43.3665
		海桐	40	2.75	[12]王芳. 基于叶面积指数的群落固碳释氧和降温增湿功能研究[D].华中农业大学,2013.	0.8	0.502655	3.64	2.91	56.27	[2]杨清. 煤矿复垦区绿化树种固碳释氧、降温增湿效应研究[D].安徽理工大学,2013. [7]王芳. 基于叶面积指数的群落固碳释氧和降温增湿功能研究[D].华中农业大学,2013.	10.01	8.0025	5.03157	4.0225	201.263	160.9	1012.86	2.44894e+06	0.162483	32.4135	1.01286	1.42699	0.0411914	0.729191	0.828202	43.4149
		桂花	40	3.18	[3]姚侠妹,偶春,夏璐,姚晓洁,陈媛媛,王宁馨.安徽沿淮地区小城镇主要景观树种固碳释氧和降温增湿效益评估[J].生态学杂志,2021,40(05):1293-1304.	2.55	5.10705	8.48	6.17	103.22	[4]姚侠妹,偶春,夏璐,姚晓洁,陈媛媛,王宁馨.安徽沿淮地区小城镇主要景观树种固碳释氧和降温增湿效益评估[J].生态学杂志,2021,40(05):1293-1304.	26.9664	19.6206	137.719	100.203	5508.75	4008.14	1857.96	4.49226e+06	0.298053	32.2779	1.85796	2.61763	0.0755603	0.76356	15.4356	43.8972
		锦带	40	3.14	[12]王芳. 基于叶面积指数的群落固碳释氧和降温增湿功能研究[D].华中农业大学,2013.	0.6	0.282743	2.89	2.1	22.1	[2]杨清. 煤矿复垦区绿化树种固碳释氧、降温增湿效应研究[D].安徽理工大学,2013. [7]王芳. 基于叶面积指数的群落固碳释氧和降温增湿功能研究[D].华中农业大学,2013.	9.0746	6.594	2.56578	1.86441	102.631	74.5764	397.8	961819	0.0638149	32.5122	0.3978	0.560451	0.0161779	0.704178	0.182968	43.0639
	草本	鸢尾	1200	4.11	[1]熊向艳,韩永伟,高馨婷,尚洪磊,郑烨,王宝良.北京市城乡结合部17种常用绿化植物固碳释氧功能研究[J].环境工程技术学报,2014,4(03):248-255.	0.15	0.0176715	6.34	4.61	0.04	[12]宋卓琴, et al."太原市主要园林植物春季固碳释氧和降温增湿效应." 山西农业科学 46.10(2018):1685-1690+1729.[13]熊向艳,韩永伟,高馨婷,尚洪磊,郑烨,王宝良.北京市城乡结合部17种常用绿化植物固碳释氧功能研究[J].环境工程技术学报,2014,4(03):247-255.	26.0574	18.9471	0.460472	0.334823	552.567	401.787	0.72	1740.85	0.000115502	32.5759	0.00072	0.00101439	2.92813e-05	0.688029	0.000620931	42.8373
		麦冬	1700	5.02	[6]郭鹏,丁向阳,勇浩,张机伟.南阳市三种常见草坪地被植物生态效益研究[J].河南林业科技,2005(04):17-19.	0.2	0.0314159	6.14	4.45	0.02	[12]宋卓琴, et al."太原市主要园林植物春季固碳释氧和降温增湿效应." 山西农业科学 46.10(2018):1685-1690+1729.[11]郭鹏,丁向阳,勇浩,张机伟.南阳市三种常见草坪地被植物生态效益研究[J].河南林业科技,2005(04):17-19.	30.8228	22.339	0.968327	0.7018	1646.16	1193.06	0.36	870.424	5.77511e-05	32.5759	0.00036	0.000507195	1.46406e-05	0.688015	0.000781913	42.8371
																				0.155533	32.4205			0.0394297	0.72743	5.36922

## Sheet: 不同日期舒适度计算
					581.73		24.7.1(26.79)	新T=30.44	ex=43.53	新湿度=0.44	新风速	576.491		23.7.7	新T=31.75	ex=46.88	新湿度=0.62	新风速	580.157		23 .7.14	新T=29.65	ex=41.63	新温度=0.66	新风速	576.104		23.7.22	新T=28.74	ex=39.49	新湿度=0.58	新风速	578.432		32.576			577.677			新T=30.31	ex=43.21
兴趣区	种类	名称	日蒸腾质量WH2O	Δa	7.1QL=579.56	T差	新T	Δe	Δf			7.7QL=578.81	T差	新T	Δe	Δf			7.14QL=580.01	T差	新T	Δe	Δf			22QL=580.53	T差	新T	Δe	Δf		WBGT	AVRQL=579.71	T差	新T			29QL=579.63	T差	新T	Δe	Δf
乔木		合欢	979.92	0.97992	2.3828e+06	0.158095	26.6319	1.35375	0.0310993			2.36135e+06	0.156671	35.8233	1.39526	0.0297623			2.37636e+06	0.157667	29.3923	1.36622	0.0328181			2.35976e+06	0.156566	36.5034	1.39833	0.0354097			2.36929e+06	0.157198	32.4188			2.3662e+06	0.156993	33.743	1.38586	0.0320727
		刺槐	1146.96	1.14696	2.78898e+06	0.185044	26.605	1.58452	0.0364005			2.76387e+06	0.183378	35.7966	1.6331	0.0348357			2.78144e+06	0.184544	29.3655	1.59911	0.0384123			2.76201e+06	0.183254	36.4767	1.63669	0.0414457			2.77317e+06	0.183995	32.392			2.76955e+06	0.183755	33.7162	1.6221	0.0375399
草本		鸢尾	0.72	0.00072	1750.77	0.000116161	26.7899	0.000994674	2.28503e-05			1735.01	0.000115115	35.9799	0.00102517	2.1868e-05			1746.04	0.000115847	29.5499	0.00100383	2.41132e-05			1733.84	0.000115037	36.6599	0.00102743	2.60174e-05			1740.85	0.000115502	32.5759			1738.58	0.000115351	33.8999	0.000906304	2.09744e-05
		麦冬	0.36	0.00036	875.387	5.80803e-05	26.7899	0.000497337	1.14252e-05			867.504	5.75573e-05	35.9799	0.000512585	1.0934e-05			873.02	5.79233e-05	29.5499	0.000501916	1.20566e-05			866.921	5.75186e-05	36.6599	0.000513714	1.30087e-05			870.424	5.77511e-05	32.5759			869.288	5.76757e-05	33.8999	0.000453152	1.04872e-05
		结缕草	3.24	0.00324	7878.48	0.000522723	26.7895	0.00447603	0.000102826			7807.54	0.000518016	35.9795	0.00461327	9.84059e-05			7857.18	0.000521309	29.5495	0.00451725	0.000108509			7802.29	0.000517668	36.6595	0.00462342	0.000117078			7833.82	0.00051976	32.5755			7823.6	0.000519081	33.8995	0.00407837	9.43848e-05
乔草	乔木	银杏	796.806	0.796806	1.93754e+06	0.128552	26.6614	1.10078	0.0252879			1.92009e+06	0.127395	35.8526	1.13453	0.0242007			1.9323e+06	0.128204	29.4218	1.11092	0.0266855			1.9188e+06	0.127309	36.5327	1.13703	0.0287928			1.92655e+06	0.127823	32.4482			1.92404e+06	0.127657	33.7723	1.00298	0.0232119
		广玉兰	1561.86	1.56186	3.79787e+06	0.251982	26.538	2.1577	0.049568			3.76367e+06	0.249713	35.7303	2.22385	0.0474371			3.7876e+06	0.2513	29.2987	2.17756	0.0523076			3.76114e+06	0.249545	36.4105	2.22875	0.0564382			3.77633e+06	0.250553	32.3254			3.77141e+06	0.250226	33.6498	1.966	0.0454987
	草本	鸢尾	0.72	0.00072	1750.77	0.000116161	26.7899	0.000994674	2.28503e-05			1735.01	0.000115115	35.9799	0.00102517	2.1868e-05			1746.04	0.000115847	29.5499	0.00100383	2.41132e-05			1733.84	0.000115037	36.6599	0.00102743	2.60174e-05			1740.85	0.000115502	32.5759			1738.58	0.000115351	33.8999	0.000906304	2.09744e-05
		麦冬	0.36	0.00036	872.17	5.78669e-05	26.7899	0.000497337	1.14252e-05			867.504	5.75573e-05	35.9799	0.000512585	1.0934e-05			873.02	5.79233e-05	29.5499	0.000501916	1.20566e-05			866.921	5.75186e-05	36.6599	0.000513714	1.30087e-05			870.424	5.77511e-05	32.5759			869.288	5.76757e-05	33.8999	0.000453152	1.04872e-05
乔灌	乔木	合欢	979.92	0.97992	2.3828e+06	0.158095	26.6319	1.35375	0.0310993			2.36135e+06	0.156671	35.8233	1.39526	0.0297623			2.37636e+06	0.157667	29.3923	1.36622	0.0328181			2.35976e+06	0.156566	36.5034	1.39833	0.0354097			2.36929e+06	0.157198	32.4188			2.3662e+06	0.156993	33.743	1.23348	0.0285462
		垂丝海棠	2306.52	2.30652	5.6086e+06	0.372121	26.4179	3.18644	0.0732009			5.5581e+06	0.36877	35.6112	3.28413	0.070054			5.59344e+06	0.371114	29.1789	3.21578	0.0772466			5.55436e+06	0.368522	36.2915	3.29136	0.0833467			5.57681e+06	0.370011	26.28			5.56953e+06	0.369528	33.5305	2.90335	0.0671915
	灌木	红花继木	3345.5	3.3455	8.13501e+06	0.539743	26.2503	4.62178	0.106174			8.06176e+06	0.534883	35.4451	4.76348	0.10161			8.11301e+06	0.538284	29.0117	4.66433	0.112043			8.05634e+06	0.534524	36.1255	4.77397	0.12089			8.08889e+06	0.536683	26.1133			8.07834e+06	0.535983	33.364	4.21116	0.0974581
		紫薇	928.08	0.92808	2.25675e+06	0.149731	26.6403	1.28213	0.029454			2.23643e+06	0.148383	35.8316	1.32144	0.0281878			2.25064e+06	0.149326	29.4007	1.29394	0.0310819			2.23492e+06	0.148283	36.5117	1.32435	0.0335364			2.24395e+06	0.148882	26.5011			2.24103e+06	0.148688	33.7513	1.16823	0.027036
		山茶	1144.8	1.1448	2.78373e+06	0.184695	26.6053	1.58153	0.036332			2.75866e+06	0.183032	35.797	1.63002	0.0347701			2.7762e+06	0.184196	29.3658	1.59609	0.03834			2.75681e+06	0.182909	36.4771	1.63361	0.0413677			2.76795e+06	0.183648	26.4664			2.76434e+06	0.183409	33.7166	1.44102	0.0333493
		杜鹃	1612.8	1.6128	3.92173e+06	0.2602	26.5298	2.22807	0.0511847			3.88642e+06	0.257857	35.7221	2.29638	0.0489843			3.91113e+06	0.259496	29.2905	2.24859	0.0540136			3.88381e+06	0.257684	36.4023	2.30144	0.058279			3.8995e+06	0.258725	26.3913			3.89441e+06	0.258387	33.6416	2.03012	0.0469827
乔灌草	乔木	梧桐	914.4	0.9144	2.22348e+06	0.147524	26.6425	1.26324	0.0290199			2.20346e+06	0.146196	35.8338	1.30197	0.0277723			2.21747e+06	0.147125	29.4029	1.27487	0.0306238			2.20198e+06	0.146097	36.5139	1.30483	0.0330421			2.21088e+06	0.146688	26.5033			2.20799e+06	0.146496	33.7535	1.15101	0.0266375
		石楠	2378.68	2.37868	5.78407e+06	0.383763	26.4062	3.28613	0.0758921			5.73199e+06	0.380307	35.5997	3.38688	0.0722458			5.76843e+06	0.382725	29.1673	3.31639	0.0796634			5.72814e+06	0.380052	36.2799	3.39434	0.0859543			5.75128e+06	0.381587	26.2684			5.74378e+06	0.381089	33.5189	2.99418	0.0692937
	灌木	紫薇	928.08	0.92808	2.25675e+06	0.149731	26.6403	1.28213	0.029454			2.23643e+06	0.148383	35.8316	1.32144	0.0281878			2.25064e+06	0.149326	29.4007	1.29394	0.0310819			2.23492e+06	0.148283	36.5117	1.32435	0.0335364			2.24395e+06	0.148882	26.5011			2.24103e+06	0.148688	33.7513	1.16823	0.027036
		海桐	1012.86	1.01286	2.4629e+06	0.163409	26.6266	1.39926	0.0321447			2.44072e+06	0.161938	35.8181	1.44216	0.0307628			2.45624e+06	0.162967	29.387	1.41214	0.0339212			2.43908e+06	0.161829	36.4982	1.44533	0.0366			2.44894e+06	0.162483	26.4875			2.44574e+06	0.162271	33.7377	1.27494	0.0295057
		桂花	1857.96	1.85796	4.51787e+06	0.299753	26.4902	2.56676	0.0589652			4.47719e+06	0.297053	35.6829	2.64545	0.0564303			4.50565e+06	0.298942	29.2511	2.59039	0.0622241			4.47418e+06	0.296854	36.3631	2.65128	0.0671379			4.49226e+06	0.298053	26.3519			4.4864e+06	0.297664	33.6023	2.33872	0.0541245
		锦带	397.8	0.3978	967302	0.0641788	26.7258	0.549557	0.0126248			958592	0.0636009	35.9164	0.566407	0.0120821			964687	0.0640052	29.486	0.554618	0.0133225			957948	0.0635581	36.5964	0.567653	0.0143746			961819	0.0638149	26.5862			960564	0.0637317	33.8363	0.500733	0.0115884
	草本	鸢尾	0.72	0.00072	1750.77	0.000116161	26.7899	0.000994674	2.28503e-05			1735.01	0.000115115	35.9799	0.00102517	2.1868e-05			1746.04	0.000115847	29.5499	0.00100383	2.41132e-05			1733.84	0.000115037	36.6599	0.00102743	2.60174e-05			1740.85	0.000115502	26.6499			1738.58	0.000115351	33.8999	0.000906304	2.09744e-05
		麦冬	0.36	0.00036	875.387	5.80803e-05	26.7899	0.000497337	1.14252e-05			867.504	5.75573e-05	35.9799	0.000512585	1.0934e-05			873.02	5.79233e-05	29.5499	0.000501916	1.20566e-05			866.921	5.75186e-05	36.6599	0.000513714	1.30087e-05			870.424	5.77511e-05	26.6499			869.288	5.76757e-05	33.8999	0.000453152	1.04872e-05
							26.6336		0.0307873					35.825		0.0294471					29.394		0.0324704					36.5051		0.0350346										33.7447

## Sheet: 不同日期
	新T	lnex	ex	湿度		新湿度	风速（m/s）	新风速	wbgt
7日	30.38	3.7643	43.1336	0.41	0.03	0.44	3.04	1.6112	42.0839
14日	26.59	3.54154	34.52	0.58	0.04	0.62	3.25	1.7225	43.4719
21日	20.93	3.19817	24.4877	0.61	0.05	0.66	1.65	0.8745	18.1213
30日	28.05	3.62802	37.6381	0.54	0.04	0.58	2.29	1.2137	31.5205
				WBGT=(0.8288Ta+0.0613Tmr+0.007377SR+13.8297RH-8.7284)V-0.0551

## Sheet: 论文用
种类	名称	叶面积指数LAI	单位固碳量WCO2(g/(m²·d))	单位释氧量WO2(g/(m²·d))	总蒸腾量mmol/（m2·d）	参考文献
乔木	刺槐	4.56	22.39	16.28	63.72	[1]杨清. 煤矿复垦区绿化树种固碳释氧、降温增湿效应研究[D].安徽理工大学,2013. [2]徐玮玮. 扬州古运河生态环境林绿地树种配置及环境效应研究[D].扬州大学,2007.
	石楠	3.11	13.51	9.83	132.149	[4]姚侠妹,偶春,夏璐,姚晓洁,陈媛媛,王宁馨.安徽沿淮地区小城镇主要景观树种固碳释氧和降温增湿效益评估[J].生态学杂志,2021,40(05):1293-1304.
	垂丝海棠	2.64	10.23	7.44	128.14	[4]姚侠妹,偶春,夏璐,姚晓洁,陈媛媛,王宁馨.安徽沿淮地区小城镇主要景观树种固碳释氧和降温增湿效益评估[J].生态学杂志,2021,40(05):1293-1304.
	梧桐	9.26	6.86	4.99	50.8	[2]杨清. 煤矿复垦区绿化树种固碳释氧、降温增湿效应研究[D].安徽理工大学,2013. [3]李冰冰. 长沙市常见行道树固碳释氧滞尘效益研究[D].中南林业科技大学,2012.
	银杏	3.17	6.61	4.41	44.267	[4]姚侠妹,偶春,夏璐,姚晓洁,陈媛媛,王宁馨.安徽沿淮地区小城镇主要景观树种固碳释氧和降温增湿效益评估[J].生态学杂志,2021,40(05):1293-1304.
	广玉兰	2.83	6.29	4.57	86.77	[4]姚侠妹,偶春,夏璐,姚晓洁,陈媛媛,王宁馨.安徽沿淮地区小城镇主要景观树种固碳释氧和降温增湿效益评估[J].生态学杂志,2021,40(05):1293-1304.
	合欢	1.46	3.67	3.27	54.44	[5]陈自新,苏雪痕,刘少宗,古润泽,李延明.北京城市园林绿化生态效益的研究(2)【J】.中国园林,1998(02).[6]郭晖,周慧,张家洋.郑州市15种常见园林树种固碳释氧能力分析研究[J].西北林学院学报,2017,32(04):52-56.
灌木	桂花	3.18	8.48	6.17	103.22	[4]姚侠妹,偶春,夏璐,姚晓洁,陈媛媛,王宁馨.安徽沿淮地区小城镇主要景观树种固碳释氧和降温增湿效益评估[J].生态学杂志,2021,40(05):1293-1304.
	紫薇	2.98	7.3	5.31	51.56	[5]陈自新,苏雪痕,刘少宗,古润泽,李延明.北京城市园林绿化生态效益的研究(2)【J】.中国园林,1998(02).[7]王芳. 基于叶面积指数的群落固碳释氧和降温增湿功能研究[D].华中农业大学,2013.
	山茶	2.82	4.83	3.51	63.6	[3]姚侠妹,偶春,夏璐,姚晓洁,陈媛媛,王宁馨.安徽沿淮地区小城镇主要景观树种固碳释氧和降温增湿效益评估[J].生态学杂志,2021,40(05):1293-1304.
	海桐	2.75	3.64	2.91	56.27	[2]杨清. 煤矿复垦区绿化树种固碳释氧、降温增湿效应研究[D].安徽理工大学,2013. [7]王芳. 基于叶面积指数的群落固碳释氧和降温增湿功能研究[D].华中农业大学,2013.
	红花继木	2.49	3.23	2.35	185.861	[8]康华靖,王艳英,王令俐,李红.基于单木模型对温州常见城市绿化树种固碳增湿能力的比较[J].中南林业科技大学学报,2017,37(07):78-84+98.[7]王芳. 基于叶面积指数的群落固碳释氧和降温增湿功能研究[D].华中农业大学,2013.
	锦带	3.14	2.89	2.1	22.1	[2]杨清. 煤矿复垦区绿化树种固碳释氧、降温增湿效应研究[D].安徽理工大学,2013. [7]王芳. 基于叶面积指数的群落固碳释氧和降温增湿功能研究[D].华中农业大学,2013.
	杜鹃	3.45	1.89	1.37	89.6	[7]王芳. 基于叶面积指数的群落固碳释氧和降温增湿功能研究[D].华中农业大学,2013. [9]朱燕青. 常见灌木固碳释氧及降温增湿效应研究[D].中南林业科技大学,2013.
草本	结缕草	10.24	4.53	3.3	0.18	[10]李辉,赵卫智.北京5种草坪地被植物生态效益的研究[J].中国园林,1998(04):34-36. [11]郭鹏,丁向阳,勇浩,张机伟.南阳市三种常见草坪地被植物生态效益研究[J].河南林业科技,2005(04):17-19.
	鸢尾	4.11	6.34	4.61	0.04	[12]宋卓琴, et al."太原市主要园林植物春季固碳释氧和降温增湿效应." 山西农业科学 46.10(2018):1685-1690+1729.[13]熊向艳,韩永伟,高馨婷,尚洪磊,郑烨,王宝良.北京市城乡结合部17种常用绿化植物固碳释氧功能研究[J].环境工程技术学报,2014,4(03):247-255.
	麦冬	5.02	6.14	4.45	0.02	[12]宋卓琴, et al."太原市主要园林植物春季固碳释氧和降温增湿效应." 山西农业科学 46.10(2018):1685-1690+1729.[11]郭鹏,丁向阳,勇浩,张机伟.南阳市三种常见草坪地被植物生态效益研究[J].河南林业科技,2005(04):17-19.

## Sheet: 计算人体舒适度
日期	温度	湿度	风速（m/s）	WBGT	WBGT种植后		RH	袁WBGT（sr=0.9）	种后WBGT		种植后温度	种植后湿度	风速
2024.7.1	26.79	0.91	1.48	43.5432	42.08		41	23.3831	23.6347		26.6336	44	0.7844
2024.7.7	35.98	0.54	6.08	197.674	43.47		58	33.3967	33.988		35.825	62	3.2224
2024.7.14	29.55	0.89	3.29	104.035	18.12		61	28.1123	28.6744		29.394	66	1.7437
2024.7.22	36.66	0.51	4.18	136.68	31.52		54	33.5425	34.0926		36.5051	58	2.2154
2024.7.29	33.9	0.59	4.36	136.681			54	31.0684	31.541		33.7447	57.5	1.99148
平均	32.576	0.688	3.878	122.25			58	30.4442
	32.416		3				68	31.7358
	32.09		3				68	31.4315
									[0.8288*(26.65-a)+0.0613*(26.65-a)+0.007377*238.02+13.8297*(0.54+b)-8.7284]*1.36-0.0551
WBGT=(0.8288Ta+0.0613Tmr+0.007377SR+13.8297RH-8.7284)V-0.0551
	防风系数 0.47
	[1]汪大林. 淮河河道防护林小气候及其防护效应的研究[D].安徽农业大学,2012.
	袁WBGT=0.735Ta+0.0374RH+0.00292(Ta*RH)+7.619SR−4.557SR*SR−0.0572v−4.064

## Sheet: 天气
日期	温度	湿度	风速（m/s）	L = 597－0.57×t	Δe	ex
2024.7.1	26.79	0.91	1.48	581.73
2024.7.7	35.98	0.54	6.08	576.491
2024.7.14	29.55	0.89	3.29	580.157
2024.7.22	36.66	0.51	4.18	576.104
2024.7.29	33.9	0.59	4.36	577.677
	32.576	0.688	3.878
	L = 597－0.57×t		578.432
	ex=34.643

[truncated: 8 more sheets: Sheet1, Sheet2, 对比表, 最后总表, 图2, 前期固碳, 固碳释氧量, Sheet3]
